# Supplementary material for: New Software for Gluten-Free Diet Evaluation and Nutritional Education
Source: MDPI journal article supplement (doi:10.3390/nu11102505), 2019-10-17
Supplement: s1 [file s1]

## 15. Steps to design a gluten-free diet with the software

For diet design click on

New recall

Date:

Feb 2019

Lu Ma Mi Ju Vi Sa Su

1 2 3 4 5 6 7 8 9 10 11 12 13 14 15 16 17 18 19 20 21 22 23 24 25 26 27 28

Accept Cancel

Set a date

Plan a one-day diet:

1

Date: 6-2-2019  
Date reminder:

Select one of the options and add a food that the patient consumes.

Before breakfast  
Before breakfast  
Breakfast  
Mid-morning snack  
Lunch  
Afternoon snack  
Dinner  
After dinner

Define the meal

3

Define the amount and add the food

Amount: 100

Grams  
Milliliters

How heavy is your food?

Alternative text

Add Food

2

Select foods for each meal

Name

Condensed milk with sugar

Fermented milk bifidobacterium whole

Liquid yoghurt whole milk plain with sucrose

Milk and dairy

Conventional foods

Gluten-free foods

Brand

Baguette and roll bread

Baguette bread

Baguette bread

Cereals and derivatives

Cereals and derivatives

Cereals and derivatives

Betina

Procel tunali

Schar

Complete the diet

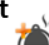

Breakfast

Hour: 9:00

Mineral water 100 gr

Milk semi-skimmed pasteurized 250 gr

Sponge cake 50 gr

Cupcake 45 gr

See the results and check if it is correct

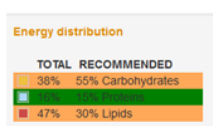

Nutrient intake + See table

| Component           | Amount  | Unit |
|---------------------|---------|------|
| Energy KCal         | 4270.9  | KCal |
| Energy              | 17815.5 | KJ   |
| Total carbohydrates | 435.8   | g    |
| Total protein       | 136.9   | g    |
| Total fats          | 217.4   | g    |
| Total dietary fiber | 21.8    | g    |

Daily recommendations

|                                       |     |
|---------------------------------------|-----|
| Olive oil 3-6 portions                | 2.0 |
| Vegetables and derivatives 2 portions | 1.1 |
| Fruits and derivatives 3 portions     | 1.3 |
| Cereals and derivatives 4-6 portions  | 3.5 |

If nutrient and food consumption recommendations are fulfilled the colours turns green, if not, it turns orange.

Clicking "+ See table" vitamin and mineral content of the diet can be observed.

Figure 1. Steps to design a gluten-free diet with the software.
